# Supplementary material for: Bone-Regenerative Ability of Platelet-Rich Plasma Following Sinus Augmentation with Anorganic Bovine Bone: A Systematic Review with Meta-Analysis
Source: MDPI journal article supplement (doi:10.3390/bioengineering9100597), 2022-10-21
Supplement: s1 [file s1]

# Bone-Regenerative Ability of Platelet-Rich Plasma following Sinus Augmentation with Anorganic Bovine Bone: A Systematic Review with Meta-Analysis

Eduardo Anitua <sup>1,2,\*</sup>, Mikel Allende <sup>1,2</sup>, Asier Eguia <sup>2</sup> and Mohammad Hamdan Alkhraisat <sup>1,2</sup>

<sup>1</sup> Regenerative Medicine Department, BTI Biotechnology Institute, 01005 Vitoria, Spain

<sup>2</sup> Clinical Research, University Institute for Regenerative Medicine and Oral Implantology (UIRMI), 01005 Vitoria, Spain

\* Correspondence: eduardo@fundacioneduardoanitua.org; Tel.: +34-945-16-06-53

**Table S1.** Excluded studies (with reasons).

| Study                       | Reason for exclusion           |
|-----------------------------|--------------------------------|
| Yilmaz et al. 2013 [63]     | New bone information is absent |
| Schaaf et al. 2007 [64]     | Autologous bone graft          |
| Schaaf et al. 2008 [65]     | Autologous bone graft          |
| Badr et al. 2016 [66]       | Autologous bone graft          |
| Khairy et al. 2012 [67]     | Autologous bone graft          |
| Raghoobar et al. 2004 [68]  | Autologous bone graft          |
| Consolo et al. 2007 [69]    | Allograft                      |
| Karaca et al. 2017 [70]     | New bone information is absent |
| Thor er al. 2005 [52]       | Autologous bone graft          |
| Thor et al. 2007 [71]       | Autologous bone graft          |
| Kassolis et al. 2005 [72]   | Allograft                      |
| Witfang et al. 2003 [73]    | Synthetic bone graft           |
| Aimetti et al. 2009 [74]    | Autologous bone graft          |
| Lindeboom et al. 2007 [75]  | Autologous bone graft          |
| Poeschl et al. 2012 [76]    | Algae-derived graft            |
| Velich et al. 2004 [77]     | Synthetic bone graft           |
| Del Fabbro et al. 2013 [78] | New bone information is absent |
| Cömert et al. 2017 [79]     | Synthetic bone graft           |
| Cömert et al. 2016 [80]     | Synthetic bone graft           |
